# Supplementary material for: Patient-reported complications related to peripherally inserted central catheters: a multicentre prospective cohort study
Source: PubMed Central journal article supplement — BMJ Qual Saf. 2019 Jan 25;28(7):574–81. doi: 10.1136/bmjqs-2018-008726 (PMC6593651; doi:10.1136/bmjqs-2018-008726), 2019-01-25
Supplement: bmjqs-2018-008726supp001.pdf [file bmjqs-2018-008726supp001.pdf]

**APPENDIX**

**PICC/Midline Follow-Up Assessment**

A. Are you currently residing in [fill in discharge location or last location], and if no, where are you currently living?

- Own Home
- Home of family member or friend
- VA nursing home/community living center
- Community based nursing home
- VA domiciliary
- Rehab facility
- Hospital
- Other

**1. Our records indicate that you had a PICC or midline (a longer, more permanent IV line) placed during your hospital stay at the [insert facility name]. Is this correct?**

- YES
- NO [End interview]

**2. Is the same PICC or midline still in place in one of your veins?**

YES → How many days has it been in place?

→ Is it still being used?  Yes  
 NO

NO → When was it removed? [prompt to enter day/month]

**Has another PICC or midline been placed since being discharged from the hospital?**

- YES → Which type of device was placed?
  - PICC Line (1)
  - Midline (2)

→ Is that PICC or midline still in place in one of your veins?

Yes → How many days has it been in place?

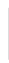

→ Is it still being used?

Yes

NO

No → When was it removed? [prompt to enter day/month]

NO [Skip to Question 4]

**If the PICC or midline is still in place or patient is using a subsequent PICC line or midline: During the past [7 days, 30 days] have you experienced any of the following? [At the 14 day call ask about the past 7 days, at the 30 and 70 day calls ask about the past 30 days.]**

| <i>If patient answers yes to any questions below, please ask the patient to describe.</i>                                                                                                          | <b>YES<br/>1</b>                                                                                                                                                                                                                           | <b>NO<br/>2</b> |
|----------------------------------------------------------------------------------------------------------------------------------------------------------------------------------------------------|--------------------------------------------------------------------------------------------------------------------------------------------------------------------------------------------------------------------------------------------|-----------------|
| Redness around the site where the PICC or mid line enters the skin?                                                                                                                                |                                                                                                                                                                                                                                            |                 |
| Redness, pain or swelling in the hand, arm or shoulder in the arm where the PICC or mid line is inserted?                                                                                          | Did you see a doctor?<br><br>Did you receive any treatments or medications?<br><br>Were you admitted to the hospital?                                                                                                                      |                 |
| Chest pain, shortness of breath or difficulty breathing that required you to seek emergency care (or go to an emergency room for evaluation)?                                                      | Did you see a doctor?<br><br>Did you receive any treatments or medications?<br><br>Were you admitted to the hospital?                                                                                                                      |                 |
| Pain, swelling, redness or tenderness in either of your legs or calves?)                                                                                                                           | Did you see a doctor?<br><br>Did you receive any treatments or medications?<br><br>Were you admitted to the hospital?                                                                                                                      |                 |
| Fevers, chills or other symptoms suggestive of an infection that required you to see a doctor?<br><br><input type="checkbox"/> Please check if patient reported symptoms but did not see a doctor. | Did the doctor indicate that the fever or symptoms might be due to an infection related to your PICC or mid line?<br><br>Were you prescribed antibiotics for the infection?<br><br>Were you admitted to the hospital due to the infection? |                 |
| Difficulty flushing, accessing or otherwise                                                                                                                                                        |                                                                                                                                                                                                                                            |                 |

|                                                                                         |  |  |
|-----------------------------------------------------------------------------------------|--|--|
| operating the PICC or mid line?                                                         |  |  |
| Restrictions in your activities of daily living related to having the PICC or mid line? |  |  |
| Restrictions in your social activities related to having the PICC or mid line?          |  |  |
| Any other problems associated with the PICC or mid line that we did not discuss?        |  |  |

**4. If PICC or midline has been removed: During the past [7 days, 30 days] have you experienced any of the following? [At the 14 day call ask about the past 7 days, at the 30 and 70 day calls ask about the past 30 days]**

| <i>If patient answers yes to any questions below, please ask the patient to describe.</i>                                                     | <b>YES<br/>1</b>                                                                                                             | <b>NO<br/>2</b> |
|-----------------------------------------------------------------------------------------------------------------------------------------------|------------------------------------------------------------------------------------------------------------------------------|-----------------|
| Redness around the site where the PICC or mid line entered the skin?                                                                          |                                                                                                                              |                 |
| Redness, pain or swelling in the hand, arm or shoulder in the arm where the PICC or mid line was inserted?                                    | <p>Did you see a doctor?</p> <p>Did you receive any treatments or medications?</p> <p>Were you admitted to the hospital?</p> |                 |
| Chest pain, shortness of breath or difficulty breathing that required you to seek emergency care (or go to an emergency room for evaluation)? | <p>Did you see a doctor?</p> <p>Did you receive any treatments or medications?</p> <p>Were you admitted to the hospital?</p> |                 |

|                                                                                                                                                                                                           |                                                                                                                                                                                                                                                   |  |
|-----------------------------------------------------------------------------------------------------------------------------------------------------------------------------------------------------------|---------------------------------------------------------------------------------------------------------------------------------------------------------------------------------------------------------------------------------------------------|--|
| <p>Pain, swelling, redness or tenderness in either of your legs or calves?</p>                                                                                                                            | <p>Did you see a doctor?</p> <p>Did you receive any treatments or medications?</p> <p>Were you admitted to the hospital?</p>                                                                                                                      |  |
| <p>Fevers, Chills or other symptoms suggestive of an infection that required you to see a doctor?</p> <p><input type="checkbox"/> Please check if patient reported symptoms but did not see a doctor.</p> | <p>Did the doctor indicate that the fever or symptoms might be due to an infection related to your PICC or mid line?</p> <p>Were you prescribed antibiotics for the infection?</p> <p>Were you admitted to the hospital due to the infection?</p> |  |
| <p>Were you told you have a bloodstream infection?</p>                                                                                                                                                    | <p>Did the doctor indicate that the infection might be related to your PICC or mid line?</p> <p>Were you prescribed antibiotics for the infection?</p> <p>Were you admitted to the hospital due to the infection?</p>                             |  |
| <p>Any other problem associated with having had the PICC or midline that we did not discuss?</p>                                                                                                          |                                                                                                                                                                                                                                                   |  |
