# Supplementary material for: Patient-reported complications related to peripherally inserted central catheters: a multicentre prospective cohort study
Source: PubMed Central journal article supplement — BMJ Qual Saf. 2019 Jan 25;28(7):574–81. doi: 10.1136/bmjqs-2018-008726 (PMC6593651; doi:10.1136/bmjqs-2018-008726), 2019-01-25
Supplement: bmjqs-2018-008726supp002.pdf [file bmjqs-2018-008726supp002.pdf]

**APPENDIX**

**Guide for Initial PICC/Midline Interview**

**a) Which race do you identify with? [check all that apply]**

- 1 - American Indian or Alaska Native
- 2 - Asian
- 3 - Black or African American
- 4 - Native or Hawaiian or Other Pacific Islander
- 5 - White
- 6 - Prefer not to answer
- 7 - More than one race

**b) Do you have Hispanic or Latino heritage?**

- 1 - Hispanic or Latino
- 2 - Not Hispanic or Latino
- 3 - Prefer not to answer

**c) (ONLY ASK WOMEN) Are you currently pregnant?**

- 1 - Yes
- 2 - No
- 3 - Prefer not to answer
- 4 - Not Applicable (Male)

**1. Do you still have the PICC or midline in place?**

- Yes** [VISUALLY VERIFY]
- No** [ANSWER QUESTION 2 THEN SKIP TO QUESTION 6]

**What type of catheter was placed?**

- PICC Line
- Midline

**2. Can you tell me the reason why the PICC or midline was placed (i.e., what it is being used for)? [IF PATIENT NO LONGER HAS A CATHETER, SKIP TO QUESTION 6]**

- 1- Long term antibiotics
- 2- Venous access
- 3- Total parenteral nutrition (TPN)
- 4- Chemotherapy
- 5- Don't Know
- 6- Other Specify \_\_\_\_\_

3. Since you have had this line, has someone used it to obtain a blood sample?

- YES
- NO
- DON'T KNOW

4. Since you have had this line, have you been 'stuck' for a blood sample?

- YES
- NO
- DON'T KNOW

5. Is the current PICC or midline...

|                                        | Yes | No | Patient Comments                |
|----------------------------------------|-----|----|---------------------------------|
| Comfortable?                           |     |    |                                 |
| Painful?<br>- If yes, rate: 0-10 scale |     |    | [0=No pain/10=Worst pain] _____ |
| Convenient?                            |     |    |                                 |
| Restricting your daily activity?       |     |    |                                 |
| Causing you embarrassment?             |     |    |                                 |

6. Now I have some questions about the catheter placement:

a. Who placed the catheter

- 1- PICC Nurse
- 2- Physician, please specify type, e.g., hospitalist, intensivist, emergency department, surgeon
- 3- Interventional Radiologist
- 4- Other Specify \_\_\_\_\_
- 5- Don't Know

b. Was there more than one attempt to place the catheter?

- Yes Specify number of attempts \_\_\_\_\_
- No
- Don't Know

c. Did the insertion require more than one person?

- Yes
- No
- Don't Know

d. Did you experience any pain/discomfort/bleeding/other trauma? If yes, were there any interventions (medications/procedures) to address the complication?

- Yes – Interventions \_\_\_\_\_
- No
- Don't Know

7. Do you have any other comments about the PICC or midline?

8. For patients that have had the PICC or midline removed:

|                                                                                                 | Yes | No | Patient Comments                              |
|-------------------------------------------------------------------------------------------------|-----|----|-----------------------------------------------|
| Do you have any discomfort now that you no longer have the PICC or midline?                     |     |    |                                               |
| Is there any pain where the PICC or midline was inserted? - If yes, rate: 0-10 scale            |     |    | [0=No pain/10=Worst pain]_____                |
| Is there any redness or swelling where the PICC or midline was inserted?                        |     |    | Were you given any treatments or medications? |
| Is it difficult for you to get your medication now that you no longer have the PICC or midline? |     |    |                                               |
| Is your daily activity affected now that you no longer have the PICC or midline?                |     |    |                                               |
| Are you embarrassed now that you no longer have the PICC or midline?                            |     |    |                                               |
| Do you have any other comments about not having the PICC or midline?                            |     |    |                                               |

9. Now I have some questions about the PICC/midline removal:

a. Who removed the PICC/midline?

- 1-PICC Nurse
- 2-Physician, please specify type, e.g., hospitalist, intensivist, emergency department, surgeon
- 3-Interventional Radiologist
- 4-Other Specify \_\_\_\_\_

b. Did you experience any pain/discomfort/bleeding/other trauma? If yes, were there any interventions (medications/procedures) to address the complication?

- Yes – Interventions \_\_\_\_\_
- No
- Don't Know

[\*\*\*REPORT ALL COMPLICATIONS TO THE PT'S NURSE]

-----End of Survey-----
